# Supplementary material
Source: bioRxiv or medRxiv preprint supplement (https://medrxiv.org/highwire/filestream/69280/field_highwire_adjunct_files/0/19006635-1.pdf)
Supplement: Supplementary file [file 19006635-1.pdf]

# Supplementary Information

## Simulation for single site CN calling

We simulate the numbers of reads at one single site at a sample median depth of 30X, 35X and 40X based on a Poisson distribution, and sample *SMN1* supporting reads based on a binomial model with all possible combinations of *SMN1* CN and *SMN2* CN when the total *SMN* CN is between 2 and 6. With the number of supporting reads for *SMN1* and *SMN2*, we derive the posterior probability of our simulated *SMN1* CN (See Methods). The posterior probability is high (>0.9) when at least one value of *SMN1* or *SMN2* CN is low (smaller or equal to 1) (Figure S1). When both values are larger than 2, i.e. in *SMN1:SMN2* combinations of 2:2, 2:3, 2:4, 3:2, 3:3, and 4:2, the posterior probability frequently becomes low and falls below 0.9. This results from the higher variability in read depth when the expected CN is higher. Therefore, in these scenarios it is less accurate to make *SMN1* and *SMN2* CN calls using one single site.

## Supplementary Figures

Figure S1. Distribution of posterior probability for simulated *SMN1* CN using a single site at different read depths and *SMN1:SMN2* CN combinations

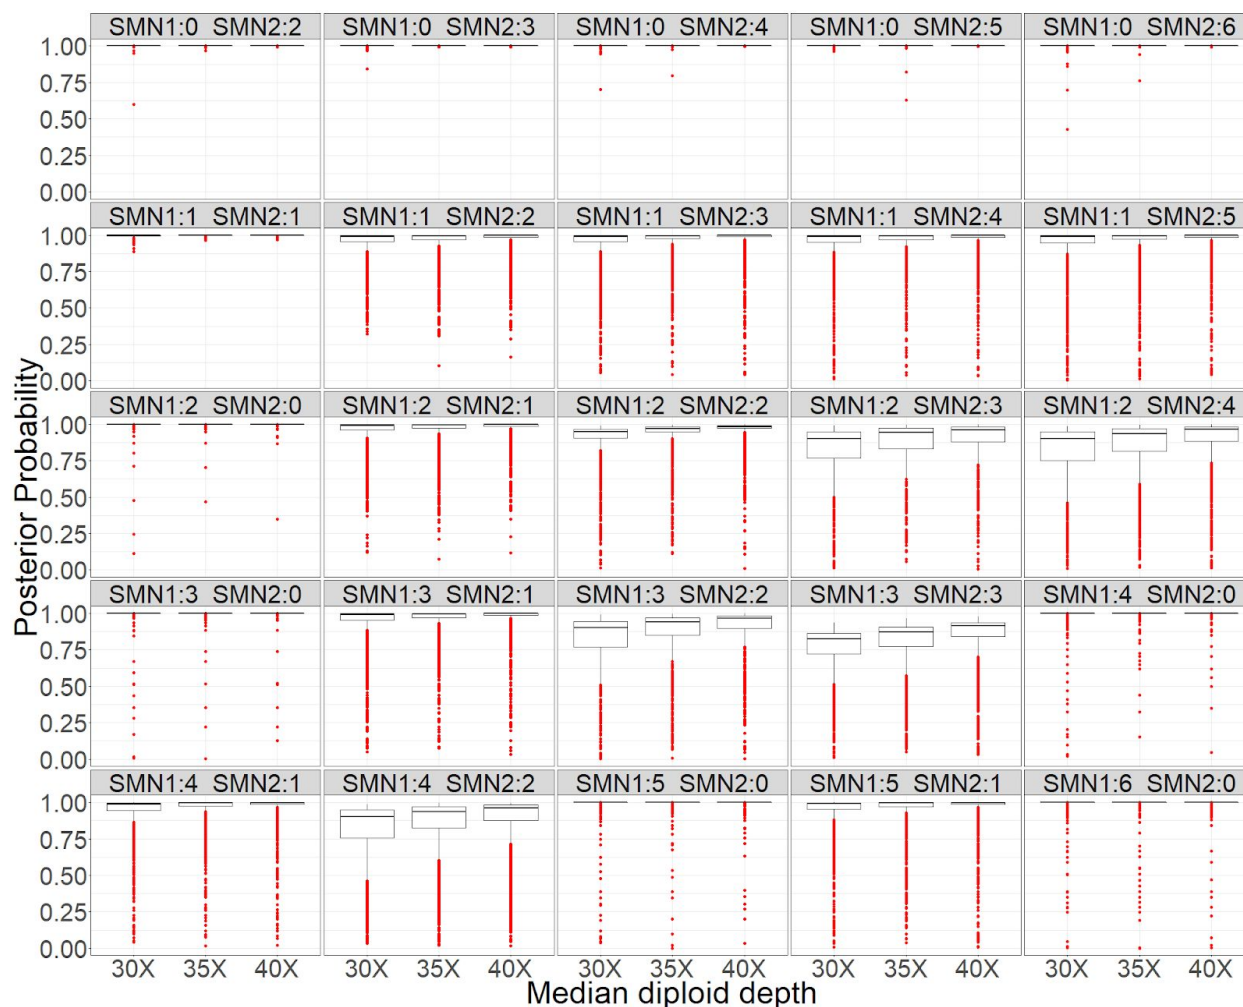

Figure S2. IGV snapshot of the *SMN2* region in a sample with the exon 7-8 deletion.

Horizontal lines join two reads in a pair in the center alignment track. BLAT results of two split reads spanning the breakpoint are shown in the bottom track, showing two segments of the same read aligning to either side of the deletion breakpoint.

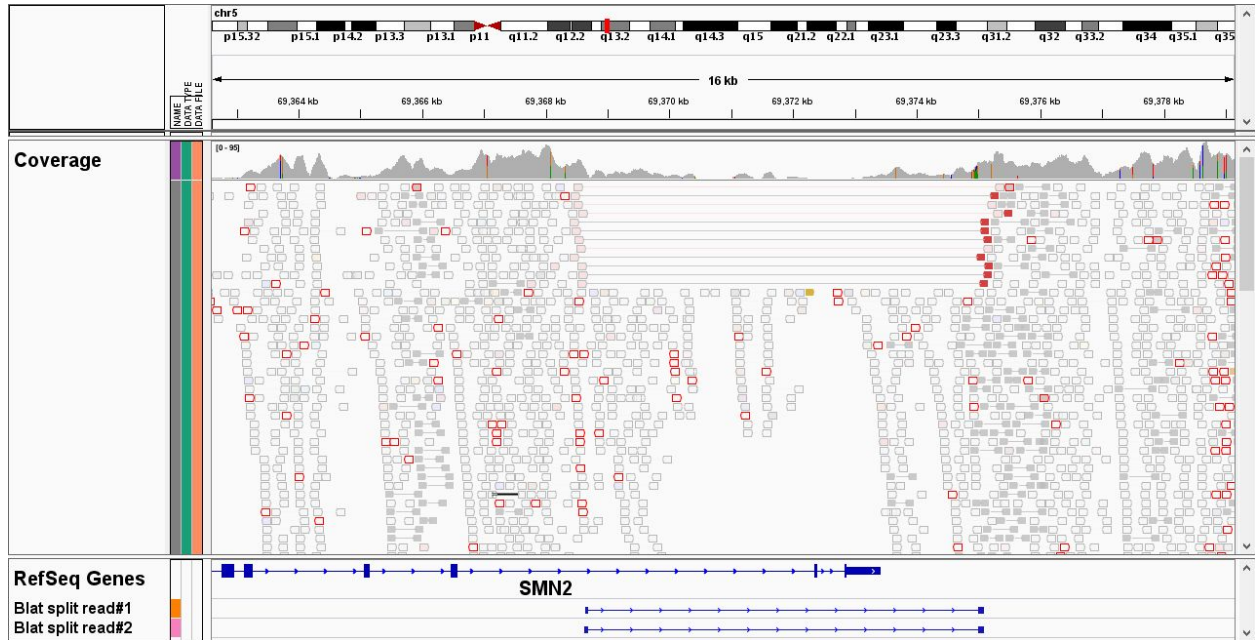

Figure S3. Correlation between raw *SMN1* CNs at 15 base differences near c840.C>T and raw *SMN1* CNs at the c840.C>T site.

The raw *SMN1* CN at each site is calculated as the CN of intact *SMN* times the fraction of *SMN1* supporting read counts out of *SMN1* + *SMN2* supporting read counts. Correlation coefficients are listed in the title of each plot.

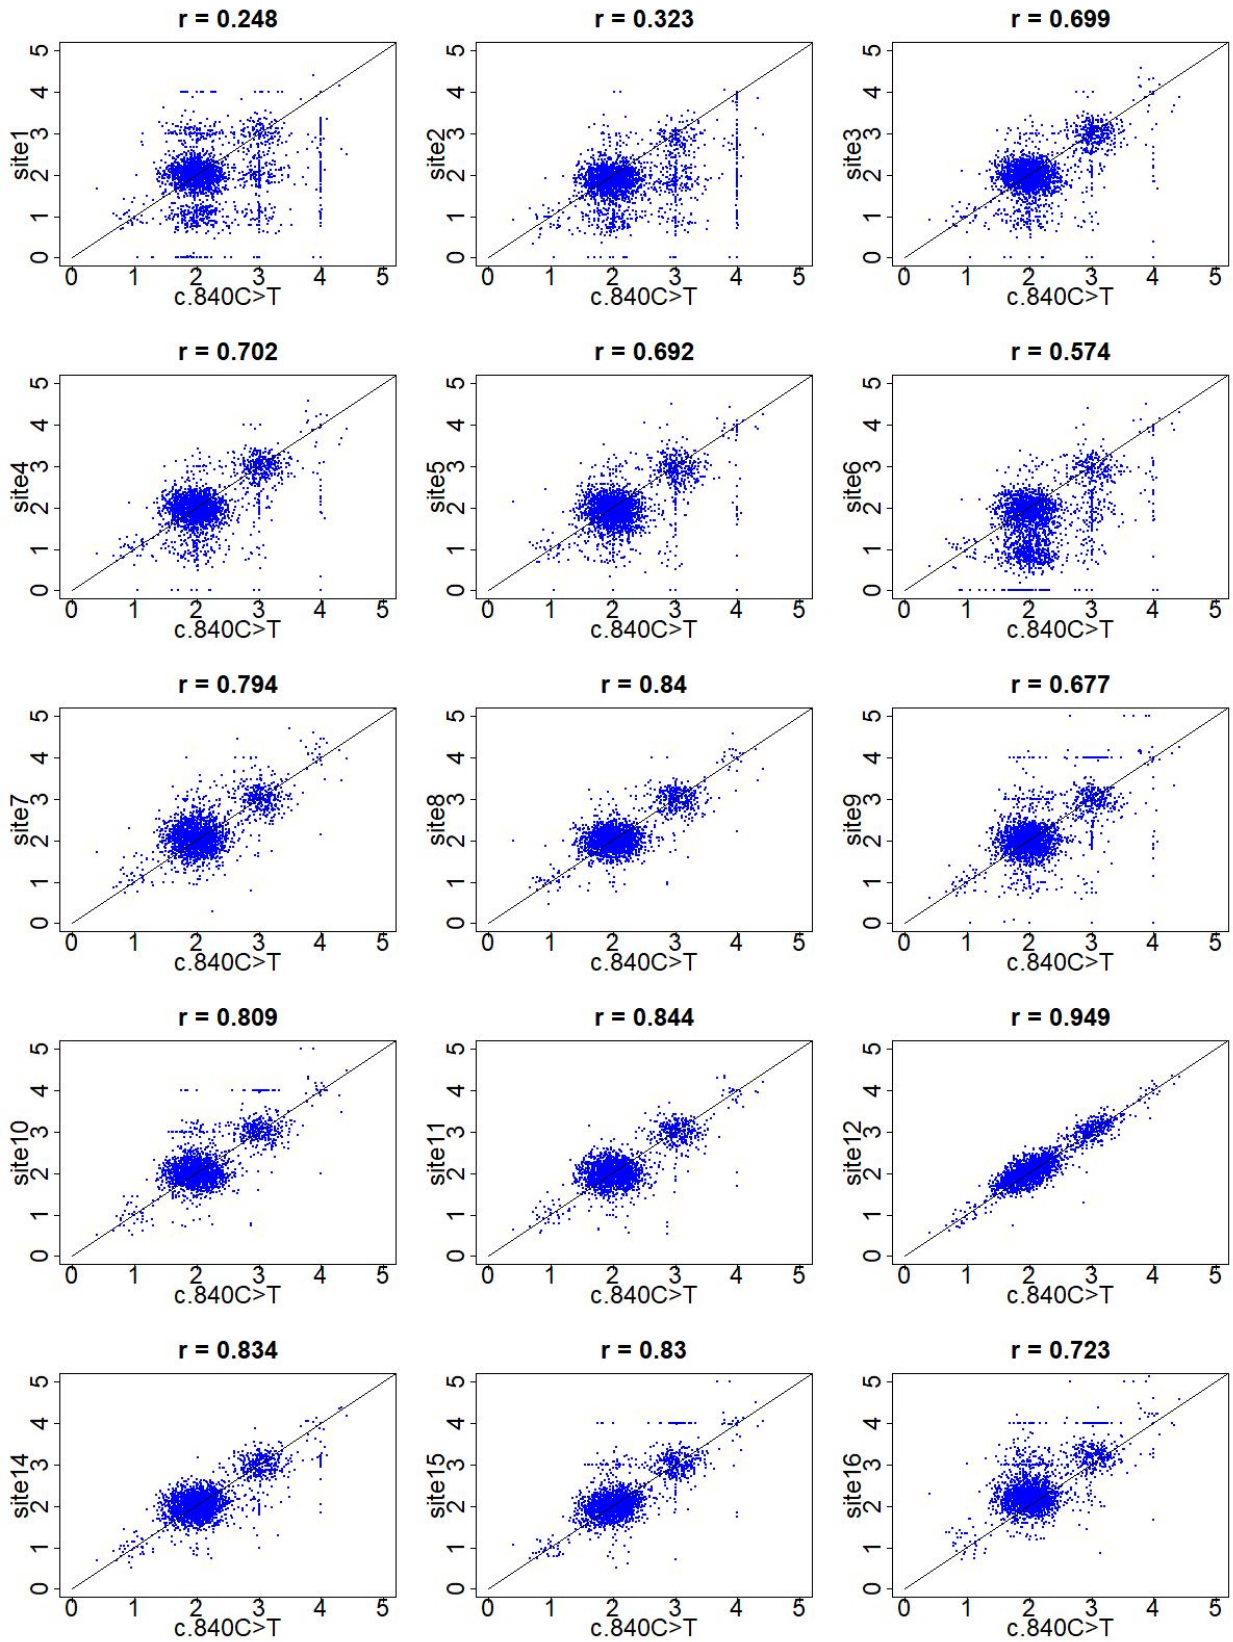

Figure S4. *SMN1/SMN2* haplotypes in samples with *SMN1:2 SMN2:0* and *SMN1:2 SMN2:1* in 1kGP.

The y axis shows the raw *SMN1* CNs as defined in Figure S3. The x axis shows the 16 sites whose indices are listed and explained in Table S1. Index #13 represents the c840.C>T site. Samples with *SMN1:2 SMN2:0* are shown together in the upper left plot. Samples with *SMN1:2 SMN2:1* are shown as 5 clusters. **A.** Non-Africans. **B.** Africans.



**A**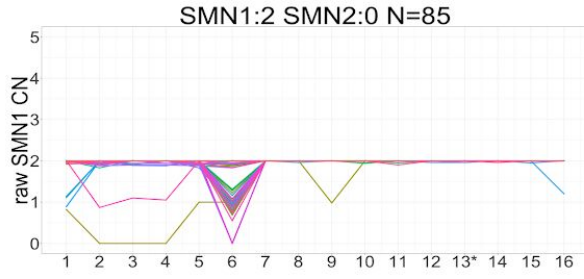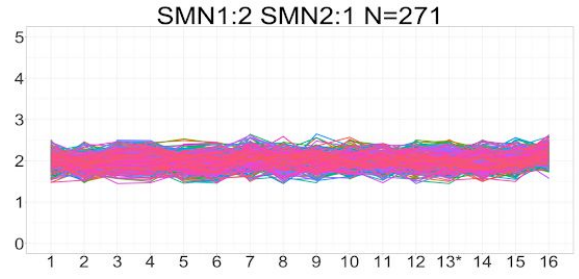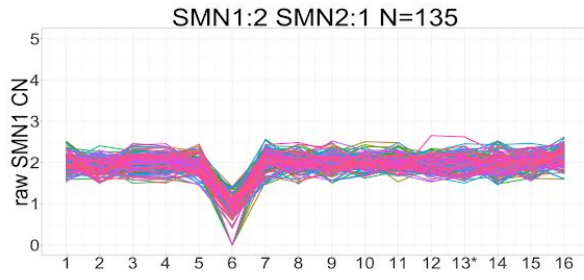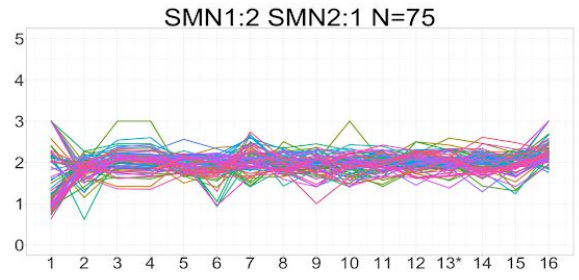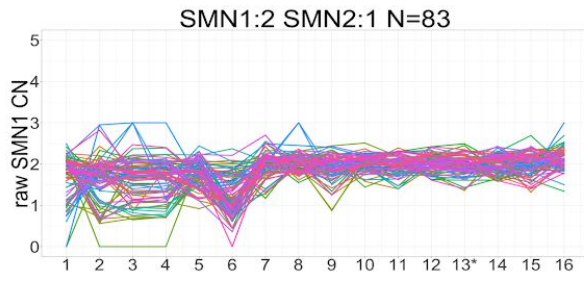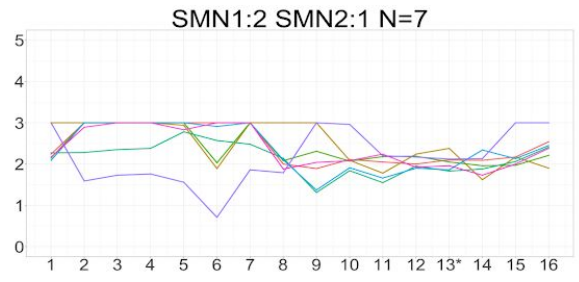**B**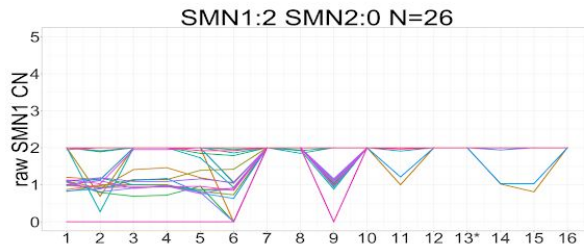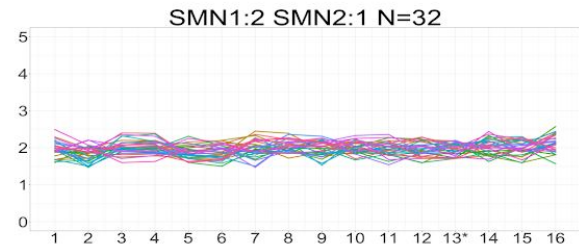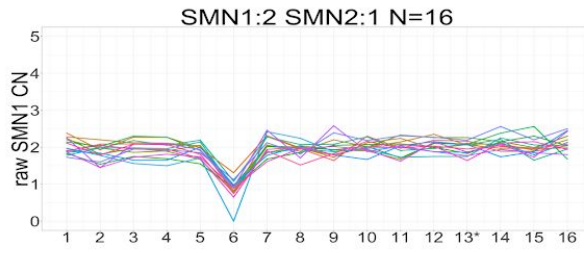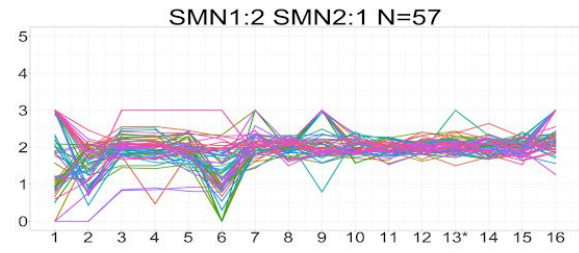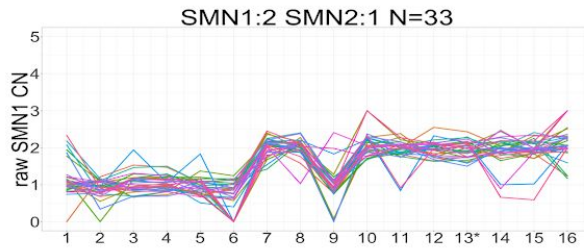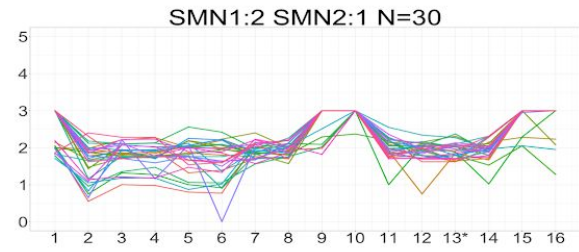

Figure S5. 1.9kb deletion in *SMN1* in MB509

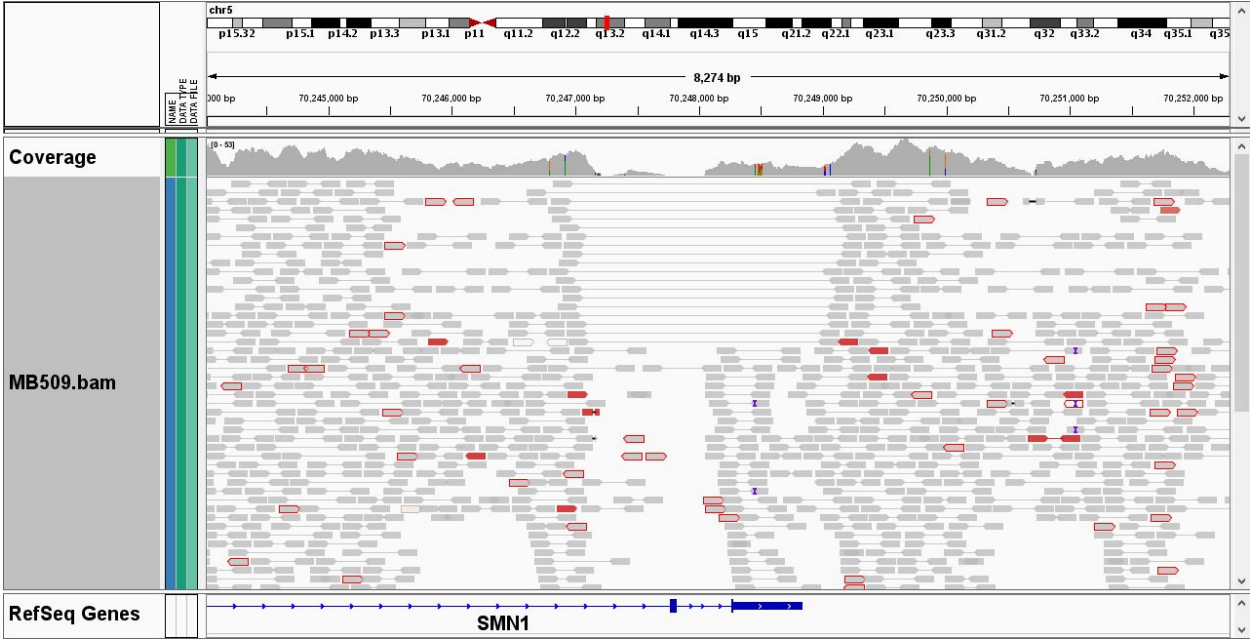

Figure S6. *SMN1/SMN2/SMN\** CNs in 1kGP and NIHR cohorts

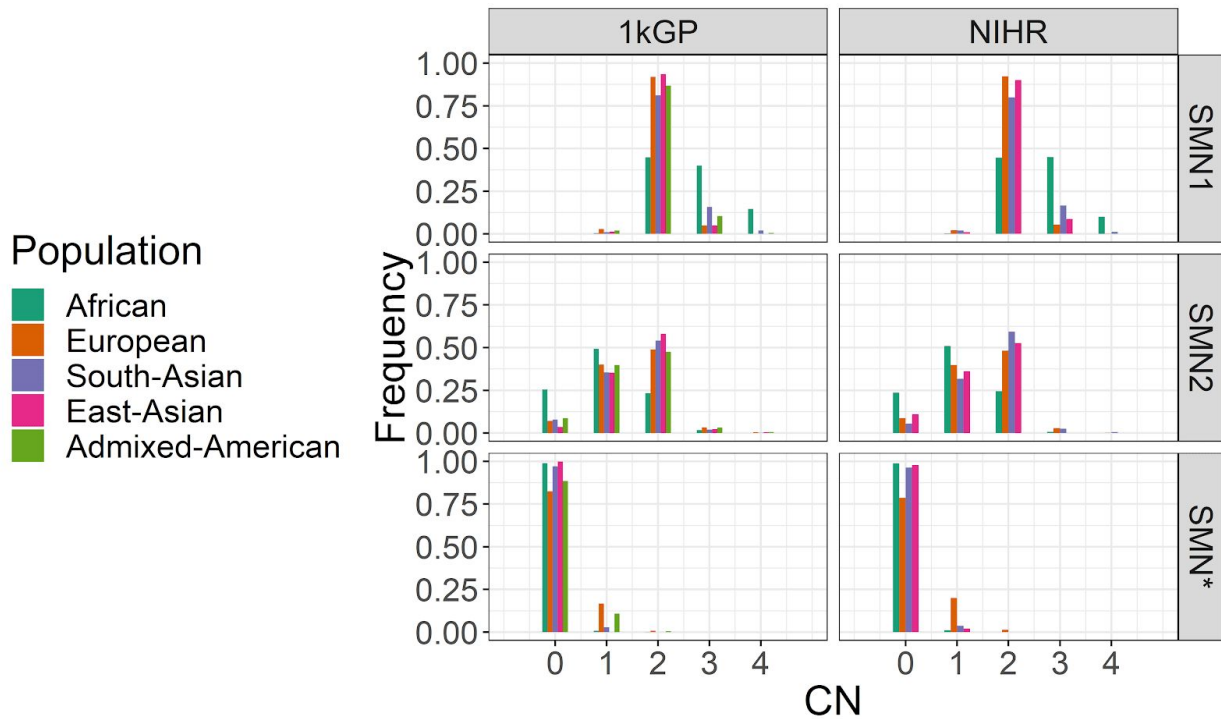

## Supplementary Tables

Table S1. Genome coordinates of base differences between *SMN1* and *SMN2*

| Index | Location | Selected | <i>SMN1</i>    |      | <i>SMN2</i>    |      |
|-------|----------|----------|----------------|------|----------------|------|
|       |          |          | Position, hg19 | Base | Position, hg19 | Base |
| 1     | Intron 6 |          | 70244142       | A    | 69368717       | G    |
| 2     | Intron 6 |          | 70245876       | T    | 69370451       | C    |
| 3     | Intron 6 |          | 70246016       | G    | 69370591       | A    |
| 4     | Intron 6 |          | 70246019       | T    | 69370594       | C    |
| 5     | Intron 6 |          | 70246156       | G    | 69370731       | A    |
| 6     | Intron 6 |          | 70246167       | T    | 69370742       | C    |
| 7     | Intron 6 | yes      | 70246320       | G    | 69370895       | A    |



|    |                      |     |          |   |          |   |
|----|----------------------|-----|----------|---|----------|---|
| 8  | Intron 6             | yes | 70246793 | G | 69371368 | A |
| 9  | Intron 6             |     | 70246919 | A | 69371499 | C |
| 10 | Intron 6             | yes | 70247219 | G | 69371799 | A |
| 11 | Intron 6             | yes | 70247290 | T | 69371870 | C |
| 12 | Intron 6             | yes | 70247724 | G | 69372304 | A |
| 13 | Exon 7<br>(c.840C>T) | yes | 70247773 | C | 69372353 | T |
| 14 | Intron 7             | yes | 70247921 | A | 69372501 | G |
| 15 | Intron 7             | yes | 70248036 | A | 69372616 | G |
| 16 | Exon 8               |     | 70248501 | G | 69373081 | A |

Table S2. Frequencies of *SMN1* haplotypes with *SMN2* allele and *SMN2* haplotypes with *SMN1* allele in two simple CN states (*SMN1*=CN2 and *SMN2*=CN0 or *SMN1*=CN2 and *SMN2*=CN1). Numbers in parentheses indicate those contributed by African populations.

| Site index | # <i>SMN1</i> haplotypes with confident CN call | # <i>SMN1</i> haplotypes with <i>SMN2</i> allele | Percentage | # <i>SMN2</i> haplotypes with confident CN call | # <i>SMN2</i> haplotypes with <i>SMN1</i> allele | Percentage |
|------------|-------------------------------------------------|--------------------------------------------------|------------|-------------------------------------------------|--------------------------------------------------|------------|
| 1          | 12292                                           | 490 (71)                                         | 4          | 5041                                            | 101 (34)                                         | 2          |
| 2          | 9372                                            | 542 (79)                                         | 5.8        | 3669                                            | 46 (0)                                           | 1.3        |
| 3          | 11784                                           | 187 (48)                                         | 1.6        | 4788                                            | 48 (1)                                           | 1          |
| 4          | 11056                                           | 205 (51)                                         | 1.9        | 4428                                            | 43 (1)                                           | 1          |
| 5          | 10212                                           | 312 (51)                                         | 3.1        | 4087                                            | 34 (1)                                           | 0.8        |
| 6          | 9974                                            | 1787 (111)                                       | 17.9       | 3946                                            | 28 (1)                                           | 0.7        |
| 7          | 11956                                           | 58 (0)                                           | 0.5        | 4874                                            | 45 (3)                                           | 0.9        |
| 8          | 12218                                           | 15 (1)                                           | 0.1        | 5005                                            | 8 (0)                                            | 0.2        |

|    |       |         |     |      |         |     |
|----|-------|---------|-----|------|---------|-----|
| 9  | 11872 | 79 (47) | 0.7 | 4831 | 56 (35) | 1.2 |
| 10 | 12484 | 2 (0)   | 0   | 5137 | 39 (29) | 0.8 |
| 11 | 11964 | 19 (5)  | 0.2 | 4880 | 1 (0)   | 0   |
| 12 | 12506 | 1 (1)   | 0   | 5148 | 0 (0)   | 0   |
| 13 | 12836 | 0 (0)   | 0   | 5313 | 0 (0)   | 0   |
| 14 | 12386 | 9 (6)   | 0.1 | 5088 | 0 (0)   | 0   |
| 15 | 12544 | 9 (4)   | 0.1 | 5167 | 33 (24) | 0.6 |
| 16 | 12336 | 12 (3)  | 0.1 | 5063 | 76 (41) | 1.5 |

Table S3. Number of samples with different number of agreeing sites across the 8 base difference sites. Numbers in parentheses indicate those contributed by African populations.

| SNP agreement | <i>SMN1</i><br>CN=1 | CN=2 | CN=3 | CN=4 | CN=no<br>-call | Total      | Percentage<br>of sites that<br>disagree |
|---------------|---------------------|------|------|------|----------------|------------|-----------------------------------------|
| 8             | 163                 | 6325 | 594  | 111  | 0              | 7193 (475) | 0 (0)                                   |
| 7             | 52                  | 3141 | 285  | 28   | 0              | 3506 (199) | 11.3 (1.6)                              |
| 6             | 25                  | 1197 | 150  | 9    | 0              | 1381 (137) | 16.3 (6)                                |
| 5             | 9                   | 356  | 86   | 6    | 1              | 458 (74)   | 21.1 (10)                               |
| <5            | 2*                  | 92*  | 44*  | 1*   | 36             | 175 (26)   | 19.6 (6.9)                              |

\*Calls are made in these samples based on the second consensus rule (See Methods).

Table S4. Number of no-calls due to disagreement among sites and discrepant calls made with reduced number of sites.

|                                                      |                           |          |          |          |                   |
|------------------------------------------------------|---------------------------|----------|----------|----------|-------------------|
| # sites for majority rule                            | 8<br>(Require 5 to agree) | 6<br>(4) | 4<br>(3) | 2<br>(2) | 1 (c.840C)<br>(1) |
| # no-calls due to disagreement                       | 175                       | 298      | 766      | 1149     | 700               |
| # calls different from those made with using 8 sites | 0                         | 0        | 1        | 6        | 41                |

Table S5. Validation samples

| Sample ID | SMN copy number caller |                   | Digital PCR |         |
|-----------|------------------------|-------------------|-------------|---------|
|           | intact<br>SMN1 CN      | intact<br>SMN2 CN | SMN1 CN     | SMN2 CN |
| NA03813   | 0                      | 3                 | 0           | 3       |
| NA09677   | 0                      | 3                 | 0           | 3       |
| NA23689   | 0                      | 3                 | 0           | 3       |
| NA00232   | 0                      | 2                 | 0           | 2       |
| NA10684   | 0                      | 2                 | 0           | 2       |
| NA23687   | 1                      | 2                 | 1           | 2       |
| NA23688   | 1                      | 2                 | 1           | 2       |
| NA03815   | 1                      | 1                 | 1           | 1       |
| MB122     | 2                      | 0                 | 2           | 0       |
| MB226     | 2                      | 1                 | 2           | 1       |
| MB119     | 3                      | 1                 | 3           | 1       |

|       |   |   |   |   |
|-------|---|---|---|---|
| MB370 | 3 | 1 | 3 | 1 |
| MB489 | 0 | 2 | 0 | 2 |
| MB364 | 0 | 2 | 0 | 2 |
| MB691 | 0 | 2 | 0 | 2 |
| MB488 | 0 | 2 | 0 | 2 |
| MB219 | 0 | 2 | 0 | 2 |
| MB228 | 0 | 2 | 0 | 2 |
| MB501 | 0 | 2 | 0 | 2 |
| MB362 | 0 | 2 | 0 | 2 |
| MB692 | 0 | 2 | 0 | 2 |
| MB234 | 0 | 2 | 0 | 2 |
| MB693 | 0 | 2 | 0 | 2 |
| MB510 | 0 | 2 | 0 | 2 |
| MB114 | 0 | 2 | 0 | 2 |
| MB116 | 1 | 2 | 1 | 2 |
| MB115 | 1 | 2 | 1 | 2 |
| MB104 | 2 | 2 | 2 | 2 |
| MB384 | 2 | 2 | 2 | 2 |
| MB338 | 2 | 2 | 2 | 2 |
| MB344 | 2 | 2 | 2 | 2 |
| MB345 | 2 | 2 | 2 | 2 |
| MB349 | 2 | 2 | 2 | 2 |
| MB113 | 2 | 2 | 2 | 2 |
| MB366 | 2 | 2 | 2 | 2 |
| MB351 | 3 | 2 | 3 | 2 |
| MB355 | 0 | 3 | 0 | 3 |

|       |   |   |   |   |
|-------|---|---|---|---|
| MB361 | 0 | 3 | 0 | 3 |
| MB378 | 0 | 3 | 0 | 3 |
| MB232 | 0 | 3 | 0 | 3 |
| MB106 | 0 | 3 | 0 | 3 |
| MB222 | 0 | 3 | 0 | 3 |
| MB509 | 0 | 3 | 0 | 2 |
| MB112 | 0 | 3 | 0 | 3 |
| MB339 | 1 | 3 | 1 | 3 |
| MB377 | 0 | 4 | 0 | 4 |
| MB356 | 0 | 4 | 0 | 4 |
| MB503 | 0 | 4 | 0 | 4 |

Table S6. *SMN1*, *SMN2* and *SMN\** CN calls for 258 trios in the Next Generation Children project cohort

| <i>SMN1</i>        |        |        |          |          | <i>SMN2</i>        |        |        |          |          | <i>SMN*</i>        |        |        |          |          |
|--------------------|--------|--------|----------|----------|--------------------|--------|--------|----------|----------|--------------------|--------|--------|----------|----------|
| Number of families | Father | Mother | Proband1 | Proband2 | Number of families | Father | Mother | Proband1 | Proband2 | Number of families | Father | Mother | Proband1 | Proband2 |
| 207                | 2      | 2      | 2        |          | 53                 | 2      | 2      | 2        |          | 174                | 0      | 0      | 0        |          |
| 8                  | 2      | 2      | 2        | 2        | 29                 | 2      | 1      | 1        |          | 20                 | 0      | 1      | 0        |          |
| 8                  | 2      | 3      | 3        |          | 27                 | 1      | 2      | 2        |          | 15                 | 0      | 1      | 1        |          |
| 8                  | 3      | 2      | 2        |          | 23                 | 1      | 2      | 1        |          | 15                 | 1      | 0      | 0        |          |
| 7                  | 3      | 2      | 3        |          | 23                 | 2      | 1      | 2        |          | 9                  | 1      | 0      | 1        |          |
| 4                  | 2      | 3      | 2        |          | 17                 | 1      | 1      | 1        |          | 6                  | 0      | 0      | 0        | 0        |
| 3                  | 1      | 2      | 1        |          | 12                 | 2      | 0      | 1        |          | 4                  | 1      | 1      | 1        |          |

|   |   |   |   |   |    |   |   |   |   |   |   |   |   |   |
|---|---|---|---|---|----|---|---|---|---|---|---|---|---|---|
| 3 | 1 | 2 | 2 |   | 11 | 1 | 1 | 2 |   | 3 | 1 | 1 | 0 |   |
| 2 | 1 | 1 | 0 |   | 9  | 1 | 1 | 0 |   | 2 | 0 | 2 | 1 |   |
| 2 | 2 | 2 | 1 |   | 7  | 0 | 1 | 1 |   | 2 | 1 | 0 | 1 | 0 |
| 2 | 2 | 3 | 2 | 3 | 6  | 0 | 2 | 1 |   | 2 | 1 | 0 | 1 | 1 |
| 2 | 3 | 3 | 3 |   | 4  | 1 | 0 | 1 |   | 2 | 2 | 1 | 1 |   |
| 1 | 2 | 1 | 1 |   | 3  | 0 | 0 | 0 |   | 1 | 0 | 2 | 2 |   |
| 1 | 2 | 2 | 3 |   | 3  | 2 | 2 | 1 |   | 1 | 1 | 1 | 2 |   |
|   |   |   |   |   | 2  | 1 | 2 | 1 | 1 | 1 | 2 | 0 | 1 |   |
|   |   |   |   |   | 2  | 1 | 2 | 2 | 2 | 1 | 3 | 0 | 2 |   |
|   |   |   |   |   | 2  | 1 | 3 | 1 |   |   |   |   |   |   |
|   |   |   |   |   | 2  | 2 | 1 | 1 | 2 |   |   |   |   |   |
|   |   |   |   |   | 2  | 2 | 1 | 3 |   |   |   |   |   |   |
|   |   |   |   |   | 2  | 2 | 2 | 1 | 3 |   |   |   |   |   |
|   |   |   |   |   | 2  | 2 | 2 | 2 | 2 |   |   |   |   |   |
|   |   |   |   |   | 2  | 2 | 2 | 3 |   |   |   |   |   |   |
|   |   |   |   |   | 2  | 2 | 3 | 3 |   |   |   |   |   |   |
|   |   |   |   |   | 2  | 3 | 2 | 3 |   |   |   |   |   |   |
|   |   |   |   |   | 1  | 0 | 1 | 0 |   |   |   |   |   |   |
|   |   |   |   |   | 1  | 1 | 0 | 0 |   |   |   |   |   |   |
|   |   |   |   |   | 1  | 1 | 3 | 2 |   |   |   |   |   |   |
|   |   |   |   |   | 1  | 1 | 4 | 3 |   |   |   |   |   |   |
|   |   |   |   |   | 1  | 2 | 3 | 2 |   |   |   |   |   |   |
|   |   |   |   |   | 1  | 2 | 4 | 4 |   |   |   |   |   |   |
|   |   |   |   |   | 1  | 3 | 0 | 1 |   |   |   |   |   |   |



|  |  |  |  |  |   |   |   |   |  |  |  |  |  |  |
|--|--|--|--|--|---|---|---|---|--|--|--|--|--|--|
|  |  |  |  |  | 1 | 3 | 1 | 2 |  |  |  |  |  |  |
|  |  |  |  |  | 1 | 3 | 2 | 2 |  |  |  |  |  |  |
|  |  |  |  |  | 1 | 3 | 2 | 4 |  |  |  |  |  |  |
|  |  |  |  |  | 1 | 4 | 1 | 2 |  |  |  |  |  |  |

Table S7. Number of samples by population in 1kGP and NIHR BioResource cohorts

| Ethnicity        | 1kGP | NIHR BioResource, unrelated (including NGC) | NIHR BioResource, total (including NGC) |
|------------------|------|---------------------------------------------|-----------------------------------------|
| African          | 661  | 253                                         | 295                                     |
| European         | 503  | 9186                                        | 11652                                   |
| South Asian      | 489  | 713                                         | 1012                                    |
| East Asian       | 504  | 91                                          | 97                                      |
| Admixed-American | 347  | 0                                           | 0                                       |
| Other            | 0    | 0                                           | 1127                                    |
| Total            | 2504 | 10243                                       | 14183                                   |

Table S8. *SMN1*, *SMN2* and *SMN\** copy number frequencies by population

| Ethnicity | Total | <i>SMN1</i> |             |             |             | <i>SMN2</i> |             |             |           |         | <i>SMN*</i> |         |          |
|-----------|-------|-------------|-------------|-------------|-------------|-------------|-------------|-------------|-----------|---------|-------------|---------|----------|
|           |       | 1           | 2           | 3           | 4           | 0           | 1           | 2           | 3         | 4       | 0           | 1       | 2        |
| African   | 902   | 4(0.44%)    | 404(44.79%) | 373(41.35%) | 121(13.41%) | 226(25.06%) | 449(49.78%) | 214(23.73%) | 13(1.44%) | 0(0.0%) | 892(98.89%) | 9(1.0%) | 1(0.11%) |

|                  |      |           |              |             |           |            |             |              |            |          |              |              |            |
|------------------|------|-----------|--------------|-------------|-----------|------------|-------------|--------------|------------|----------|--------------|--------------|------------|
|                  |      |           | )            | )           | )         | )          | )           | )            |            |          | )            |              |            |
| European         | 9648 | 212(2.2%) | 8899(92.24%) | 524(5.43%)  | 13(0.13%) | 833(8.63%) | 3850(39.9%) | 4667(48.37%) | 279(2.89%) | 19(0.2%) | 7591(78.74%) | 1912(19.83%) | 137(1.42%) |
| South-Asian      | 1199 | 20(1.67%) | 965(80.48%)  | 195(16.26%) | 19(1.58%) | 78(6.51%)  | 400(33.39%) | 686(57.26%)  | 29(2.42%)  | 5(0.42%) | 1155(96.65%) | 40(3.35%)    | 0(0.0%)    |
| East-Asian       | 593  | 8(1.35%)  | 552(93.09%)  | 33(5.56%)   | 0(0.0%)   | 28(4.72%)  | 211(35.58%) | 340(57.34%)  | 12(2.02%)  | 2(0.34%) | 591(99.66%)  | 2(0.34%)     | 0(0.0%)    |
| Admixed-American | 341  | 7(2.05%)  | 296(86.8%)   | 36(10.56%)  | 2(0.59%)  | 30(8.8%)   | 136(39.88%) | 162(47.51%)  | 11(3.23%)  | 2(0.59%) | 302(88.56%)  | 37(10.85%)   | 2(0.59%)   |

Table S9. Comparison of carrier calls made in the 1kGP samples by this study and Larson et al.

| Sample ID | Ethnicity | SMN1 CN | SMN2 CN | SMN* CN | Called as carrier in Larson et al. | Carrier probability, adj, by Larson et al. |
|-----------|-----------|---------|---------|---------|------------------------------------|--------------------------------------------|
| HG03583   | AFR       | 1       | 1       | 0       | yes                                | 0.645                                      |
| HG01205   | AMR       | 1       | 1       | 0       | yes                                | 0.756                                      |
| HG01892   | AMR       | 1       | 1       | 0       | yes                                | 0.902                                      |
| HG01801   | EAS       | 1       | 1       | 0       | yes                                | 0.541                                      |
| NA11932   | EUR       | 1       | 1       | 0       | yes                                | 0.716                                      |
| NA20760   | EUR       | 1       | 1       | 0       | yes                                | 0.638                                      |
| NA20896   | SAS       | 1       | 1       | 0       | yes                                | 0.514                                      |

|         |     |   |   |   |     |       |
|---------|-----|---|---|---|-----|-------|
| HG01948 | AMR | 1 | 2 | 0 | yes | 0.678 |
| HG02265 | AMR | 1 | 2 | 0 | yes | 0.982 |
| HG01085 | AMR | 1 | 2 | 0 | yes | 1     |
| NA20812 | EUR | 1 | 2 | 0 | yes | 0.999 |
| NA20764 | EUR | 1 | 2 | 0 | yes | 0.982 |
| HG00324 | EUR | 1 | 2 | 0 | yes | 0.997 |
| NA12383 | EUR | 1 | 2 | 0 | yes | 1     |
| HG03953 | SAS | 1 | 2 | 0 | yes | 0.972 |
| HG02771 | AFR | 1 | 3 | 0 | yes | 0.997 |
| HG01893 | AMR | 1 | 3 | 0 | yes | 1     |
| HG02079 | EAS | 1 | 3 | 0 | yes | 0.976 |
| NA20814 | EUR | 1 | 3 | 0 | yes | 1     |
| HG00281 | EUR | 1 | 3 | 0 | yes | 1     |
| HG00346 | EUR | 1 | 3 | 0 | yes | 1     |
| HG03740 | SAS | 1 | 3 | 0 | yes | 0.874 |
| HG02087 | EAS | 1 | 4 | 0 | yes | 1     |
| HG02134 | EAS | 1 | 4 | 0 | yes | 1     |
| NA12778 | EUR | 1 | 4 | 0 | yes | 1     |
| HG01773 | EUR | 1 | 4 | 0 | yes | 1     |
| HG01492 | AMR | 2 | 2 | 0 | yes | 0.914 |
| NA19723 | AMR | 2 | 2 | 0 | yes | 0.681 |
| NA18542 | EAS | 2 | 2 | 0 | yes | 0.633 |
| HG00525 | EAS | 2 | 2 | 0 | yes | 0.763 |
| NA20792 | EUR | 2 | 2 | 0 | yes | 0.671 |

|         |     |   |   |   |     |          |
|---------|-----|---|---|---|-----|----------|
| NA11843 | EUR | 2 | 2 | 0 | yes | 0.509    |
| NA19711 | AFR | 2 | 3 | 0 | yes | 0.943    |
| NA19346 | AFR | 2 | 3 | 0 | yes | 0.52     |
| HG01248 | AMR | 2 | 4 | 0 | yes | 0.935    |
| HG01094 | AMR | 2 | 4 | 0 | yes | 0.738    |
| HG02156 | EAS | 1 | 0 | 0 | no  | 2.36E-33 |
| HG02180 | EAS | 1 | 1 | 0 | no  | 7.26E-05 |
| NA20790 | EUR | 1 | 1 | 0 | no  | 0.489    |
| NA20787 | EUR | 1 | 1 | 1 | no  | 0.322    |
| HG01686 | EUR | 1 | 1 | 1 | no  | 0.00119  |
| NA19456 | AFR | 1 | 2 | 0 | no  | 0.278    |
| HG01455 | AMR | 1 | 2 | 0 | no  | 0.176    |
| HG01863 | EAS | 1 | 2 | 0 | no  | 0.42     |
| HG01612 | EUR | 1 | 2 | 0 | no  | 1.20E-07 |
| NA20845 | SAS | 1 | 2 | 0 | no  | 0.398    |
| HG03928 | SAS | 1 | 2 | 0 | no  | 0.442    |

Table S10. Maximum likelihood estimates for percentage of singleton and two-copy SMN1 alleles carrying c.\*3+80T>G

| Ethnicity   | Singleton <i>SMN1</i> allele     | two-copy <i>SMN1</i> allele      |
|-------------|----------------------------------|----------------------------------|
| African     | 18.4%                            | 78.5%                            |
| European    | 0.02%<br>*(1kGP European: 0.11%) | 4.35%<br>*(1kGP European: 10.0%) |
| South Asian | 0.05%                            | 2.54%                            |
| East Asian  | 0.09%                            | 2.94%                            |

|                  |      |       |
|------------------|------|-------|
| Admixed-American | 1.2% | 24.5% |
|------------------|------|-------|

\*The NIHR BioResource cohort, which takes up the majority of the European population analyzed in this study due to its large sample size, consists of Northern European samples that carry a lower frequency of c.\*3+80T>G SNP than the more diverse European samples from the 1000 Genomes project.

Table S11. SMA carrier detection and residual risk estimates

| Ethnicity          | Carrier frequency <sup>a</sup> | Detection rate (CN) <sup>a</sup> | Residual risk (CN=2) | Detection rate (CN+c.*3+80T>G SNP) | This study                        |                                 | Luo et al                   |                            | Feng et al.                 |                            | Alias et al.               |                            |
|--------------------|--------------------------------|----------------------------------|----------------------|------------------------------------|-----------------------------------|---------------------------------|-----------------------------|----------------------------|-----------------------------|----------------------------|----------------------------|----------------------------|
|                    |                                |                                  |                      |                                    | Residual risk (CN=2, SNP-)        | Residual risk (CN=2, SNP+)      | Residual risk (CN=2, SNP-)  | Residual risk (CN=2, SNP+) | Residual risk (CN=2, SNP-)  | Residual risk (CN=2, SNP+) | Residual risk (CN=2, SNP-) | Residual risk (CN=2, SNP+) |
| African            | 1 in 72                        | 70.5%                            | 1 in 129             | 91.8%                              | 1 in 346                          | 1 in 58                         | 1 in 396 (African American) | 1 in 34                    | 1 in 375 (African American) | 1 in 39                    | NA                         | NA                         |
| European           | 1 in 47                        | 94.8%                            | 1 in 790             | 95.0%                              | 1 in 814 (1kGP European 1 in 846) | 1 in 12 (1kGP European 1 in 27) | 1 in 770                    | 1 in 29                    | 1 in 921                    | 1 in 69                    | 1 in 888 (Spanish)         | ~1                         |
| Asian <sup>b</sup> | 1 in 59                        | 93.3%                            | 1 in 767             | 93.4%                              | 1 in 779                          | 1 in 57                         | 1 in 702                    | ~1                         | 1 in 907                    | 1 in 61                    | NA                         | NA                         |
| Admixed-American   | 1 in 68                        | 90.0%                            | 1 in 559             | 91.9%                              | 1 in 674                          | 1 in 71                         | 1 in 1762 (Hispanic)        | 1 in 140                   | 1 in 906 (Hispanic)         | 1 in 99                    | NA                         | NA                         |

<sup>a</sup>Numbers and *SMN1* allele frequencies for residual risk calculation taken from Sugarman et al.

<sup>b</sup>Includes East and South Asians

Table S12. *SMN1*, *SMN2* and *SMN\** CN calls for all population samples analyzed (Excel file)
